# Supplementary material for: Detailed mechanism of the autoxidation of N-hydroxyurea catalyzed by a superoxide dismutase mimic Mn(iii) porphyrin: formation of the nitrosylated Mn(ii) porphyrin as an intermediate
Source: Royal Society of Chemistry journal article supplement (doi:10.1039/c2dt31200j), 2012-01-01
Supplement: c2dt31200j.pdf [file c2dt31200j.pdf]

## Supplementary Information

### Detailed Mechanism of the Autoxidation of N-hydroxyurea Catalyzed by a Superoxide Dismutase Mimic Mn(III) Porphyrin: Formation of the Nitrosylated Mn(II) Porphyrin as an Intermediate

József Kalmár, Bernadett Biri, Gábor Lente, István Bányai, Ana Budimir, Mladen Biruš, Ines Batinić-Haberle and István Fábián

The UV-vis titrations and the data evaluation were carried out according to:  
T. Weitner et. al. *Dalton Trans.*, 2010, **39**, 11568-11576

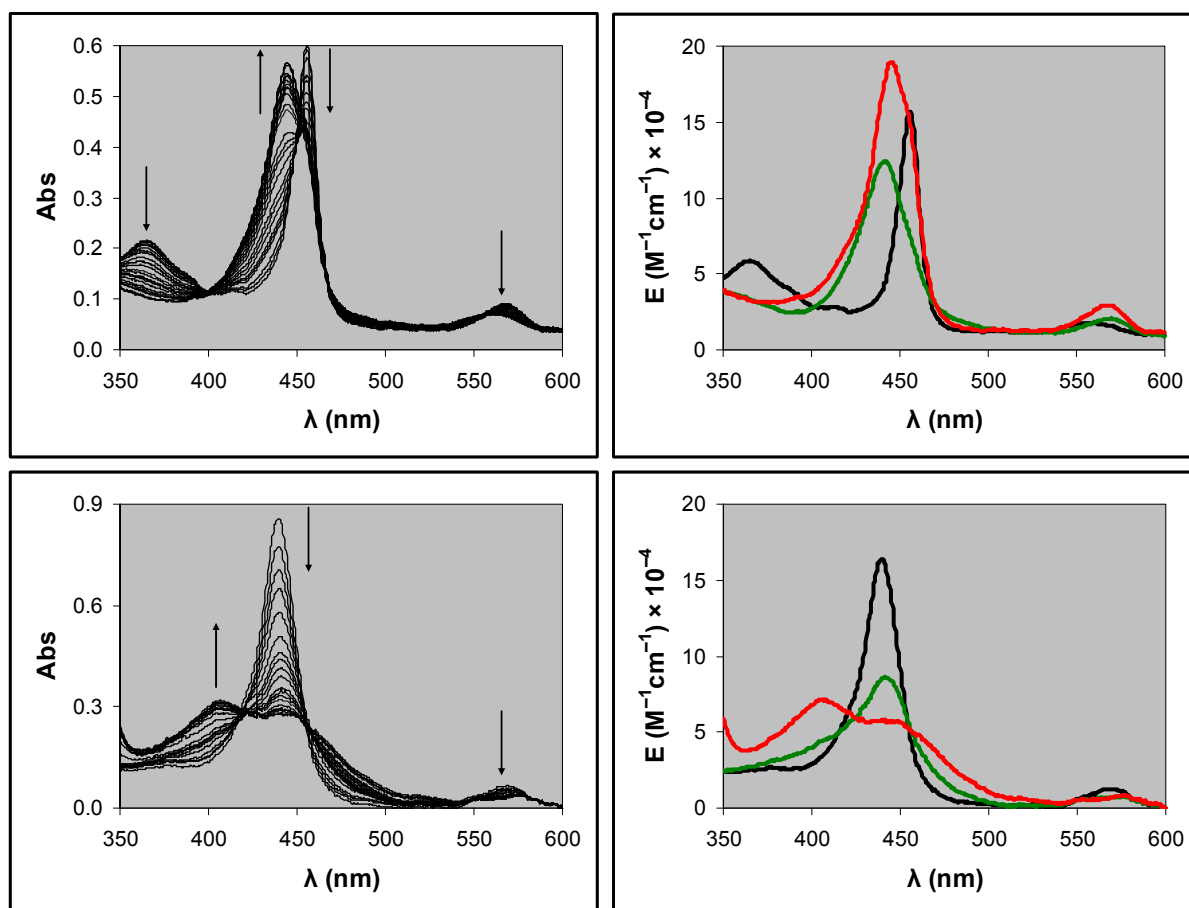

**Figure S1** UV-vis titration of Mn(III)TTEG (up) and Mn(II)TTEG (down) from pH 9.3 to pH 12.6. Left: spectral change, the pH increases with the arrows. Right: calculated individual spectrum of the protonated (black), the singly deprotonated (green) and the doubly deprotonated (red) species.  $c(\text{Mn(III)TTEG}) = 3.80 \mu\text{M}$  or  $c(\text{Mn(II)TTEG}) = 5.23 \mu\text{M}$ ,  $I = 1.0 \text{ M}$ ,  $T = 25.0 \text{ }^\circ\text{C}$ , anaerobic conditions

The  $^{17}\text{O}$ -NMR measurements and the data evaluation were carried out according to:  
A. Budimir et. al. *Dalton Trans.*, 2010, **39**, 4405–4410

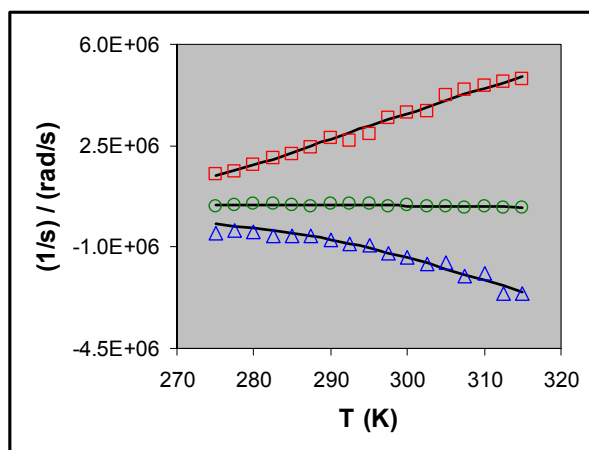

**Figure S2** Reduced relaxation rates (circles:  $1/T_{1r}$  and squares:  $1/T_{2r}$  in  $s^{-1}$  units) and chemical shift (triangles:  $\Delta\omega_r$  in  $s^{-1}\text{rad}$  units) of Mn(III)TTEG studied as a function of temperature at pH 6. Lines: result of fit according to the reference above.

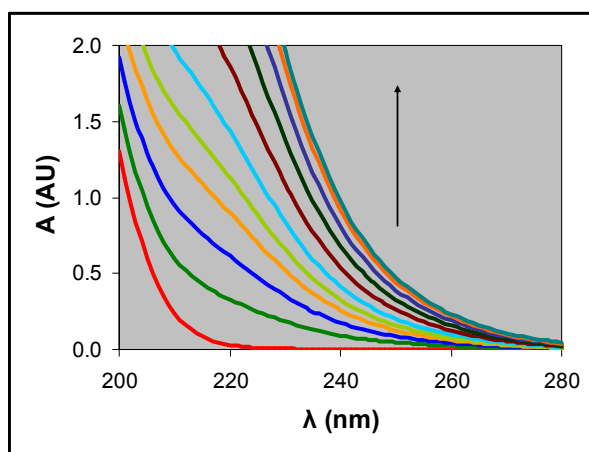

**Figure S3** The UV-vis titration of HU from pH 5.8 to pH 11.7, the pH increases with the arrow.  $c(\text{HU}) = 1.00 \text{ mM}$ ,  $I = 1.0 \text{ M}$ ,  $T = 25.0 \text{ }^\circ\text{C}$ , unaerobic conditions.

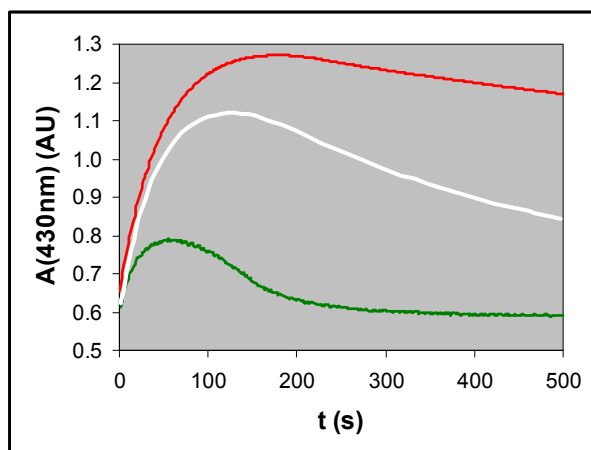

**Figure S4** The effect of the conditions of illumination on the reaction of Mn(III)TTEG and HU. The green curve was recorded in a stopped-flow instrument with PMT detection, the white in a diode-array photometer and the red in a scanning photometer, under otherwise identical conditions.  $c_0(\text{Mn(III)TTEG}) = 7.50 \mu\text{M}$ ,  $c_0(\text{HU}) = 15.0 \mu\text{M}$ ,  $c(\text{NaOH}) = 5.0 \text{ mM}$ ,  $c_0(\text{O}_2) = 254 \mu\text{M}$ ,  $I = 1.0 \text{ M}$ ,  $T = 25.0 \text{ }^\circ\text{C}$ .

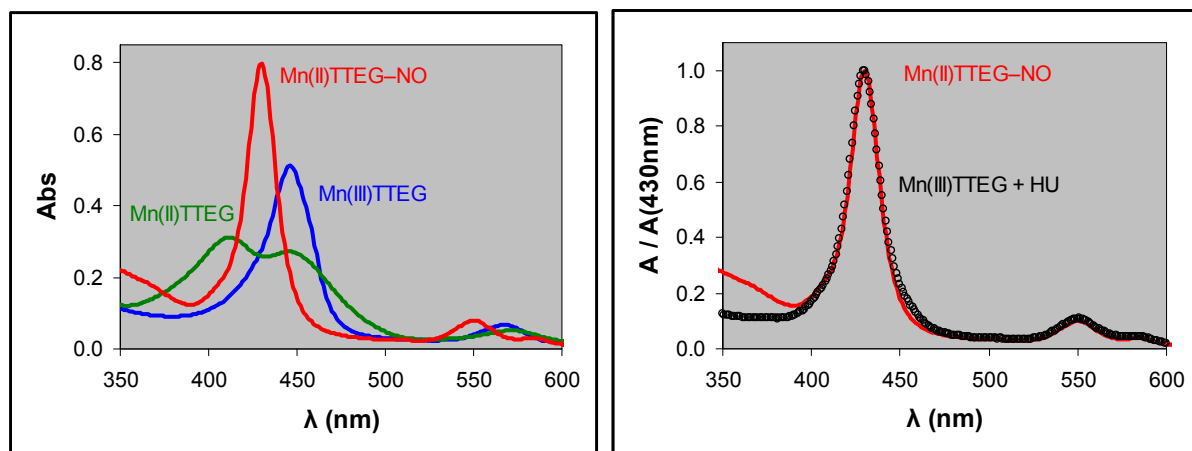

**Figure S5** Left: The UV-vis spectra of Mn(III)TTEG, Mn(II)TTEG and Mn(II)TTEG-NO.  $c(\text{Mn(III)TTEG}) = c(\text{Mn(II)TTEG}) = c(\text{Mn(II)TTEG-NO}) = 3.54 \mu\text{M}$ ,  $c(\text{NaOH}) = 5.0 \text{ mM}$ , anaerobic conditions. Right: The normalized UV-vis spectra of Mn(II)TTEG-NO and the intermediate of the reaction Mn(III)TTEG + HU recorded 150 s after mixing.  $c_0(\text{Mn(III)TTEG}) = 3.75 \mu\text{M}$ ,  $c_0(\text{HU}) = 150 \mu\text{M}$ ,  $c(\text{NaOH}) = 5.0 \text{ mM}$ ,  $c_0(\text{O}_2) = 254 \mu\text{M}$ ,  $I = 1.0 \text{ M}$ ,  $T = 25.0 \text{ }^\circ\text{C}$ .

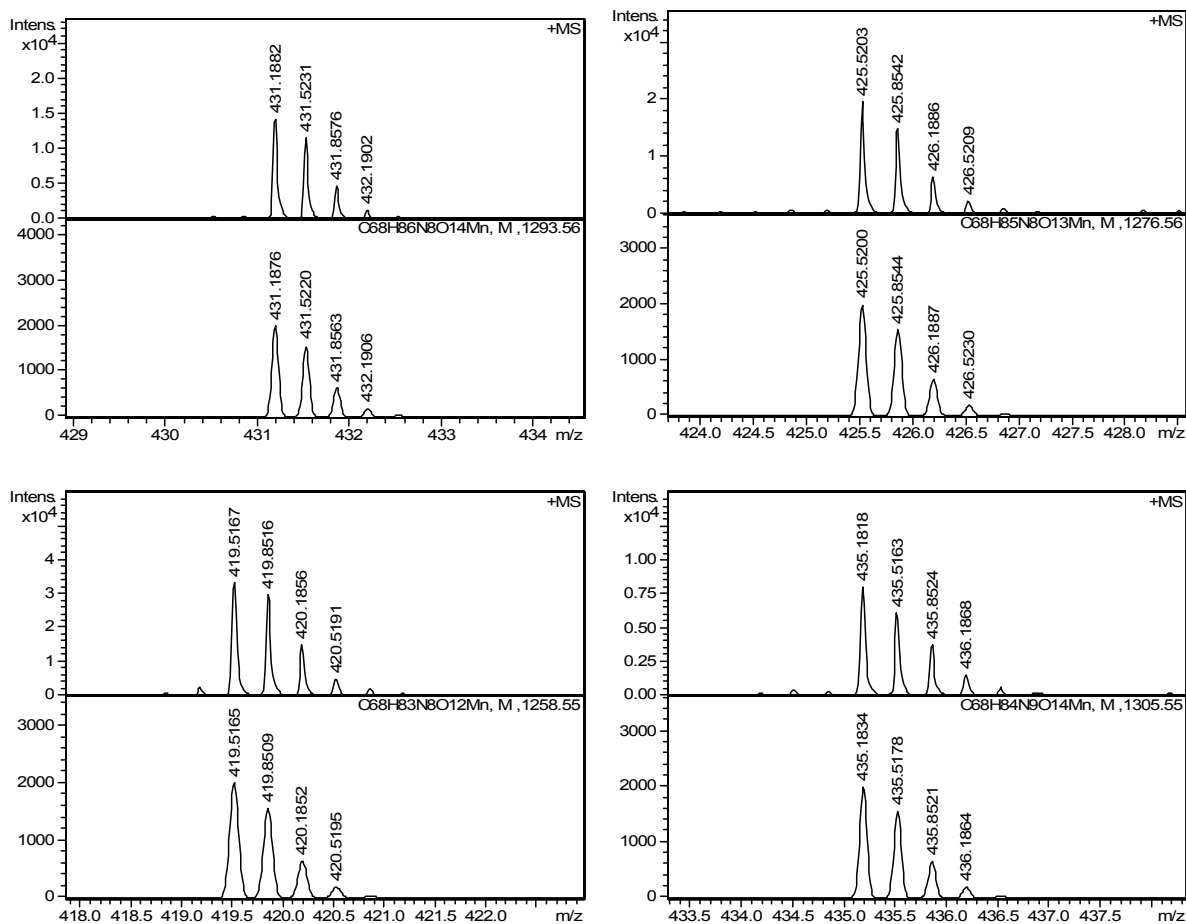

**Figure S6** Measured (upper halves) and simulated (lower halves) isotopic distributions of species corresponding to Mn(III)TTEG (m/z 431.1882), Mn(II)TTEG (m/z 425.5203 and m/z 419.5167) and Mn(II)TTEG-NO (m/z 435.1818) as seen in Table 1.

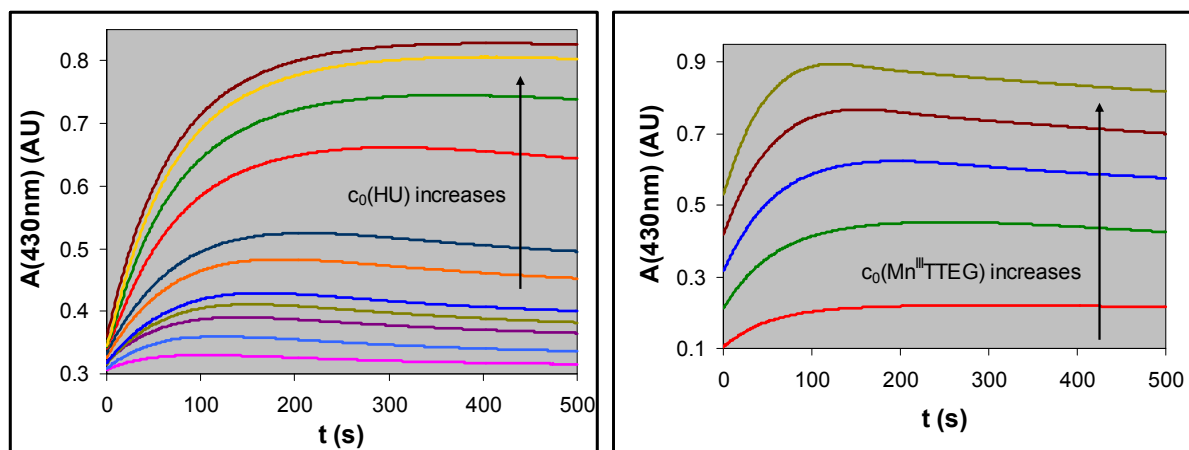

**Figure S7** The series of kinetic curves recorded during the concentration dependence measurements. Left: The initial concentration of HU was varied while that of Mn(III)TTEG was constant.  $c_0(\text{Mn(III)TTEG}) = 3.75 \mu\text{M}$ ,  $c_0(\text{HU}) =$  from  $0.763 \mu\text{M}$  to  $114 \mu\text{M}$ ,  $c(\text{NaOH}) = 50\text{mM}$ ,  $c_0(\text{O}_2) = 254 \mu\text{M}$ ,  $I = 1.0 \text{ M}$ ,  $T = 25.0 \text{ }^\circ\text{C}$ . Right: The initial concentration of Mn(III)TTEG was varied while that of HU was constant.  $c_0(\text{Mn(III)TTEG}) =$  from  $1.25 \mu\text{M}$  to  $6.25 \mu\text{M}$ ,  $c_0(\text{HU}) = 6.35 \mu\text{M}$ ,  $c(\text{NaOH}) = 5.0 \text{ mM}$ ,  $c_0(\text{O}_2) = 254 \mu\text{M}$ ,  $I = 1.0 \text{ M}$ ,  $T = 25.0 \text{ }^\circ\text{C}$ .

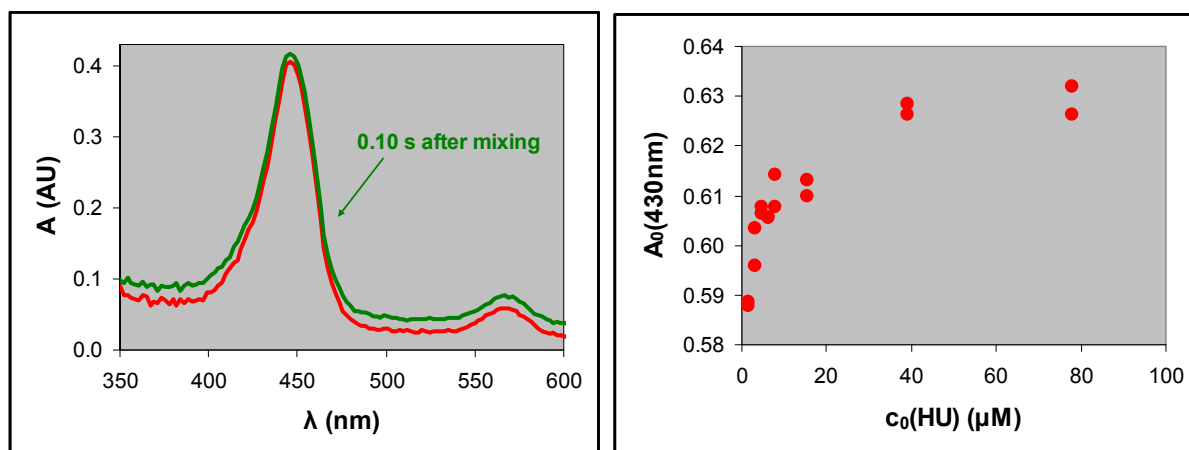

**Figure S8** Left: The visible part of the spectrum of the 0.1 s old reaction mixture of Mn(III)TTEG + HU (green) compared to the spectrum of Mn(III)TTEG (red) recorded under identical conditions.  $c_0(\text{Mn(III)TTEG}) = 3.03 \mu\text{M}$ ,  $c_0(\text{HU}) = 61.2 \mu\text{M}$ ,  $c(\text{NaOH}) = 5.0 \text{ mM}$ ,  $c_0(\text{O}_2) = 254 \mu\text{M}$ ,  $I = 1.0 \text{ M}$ ,  $T = 25.0 \text{ }^\circ\text{C}$ . Right: Dependence of the absorbance (0.10 s after mixing) at 430 nm on the initial HU concentration with constant initial Mn(III)TTEG concentration. The kinetic curves were recorded by stopped-flow PMT.  $c_0(\text{Mn(III)TTEG}) = 7.52 \mu\text{M}$ ,  $c_0(\text{HU}) =$  from  $1.56 \mu\text{M}$  to  $78.1 \mu\text{M}$ ,  $c(\text{NaOH}) = 50\text{mM}$ ,  $c_0(\text{O}_2) = 254 \mu\text{M}$ ,  $I = 1.0 \text{ M}$ ,  $T = 25.0 \text{ }^\circ\text{C}$ .

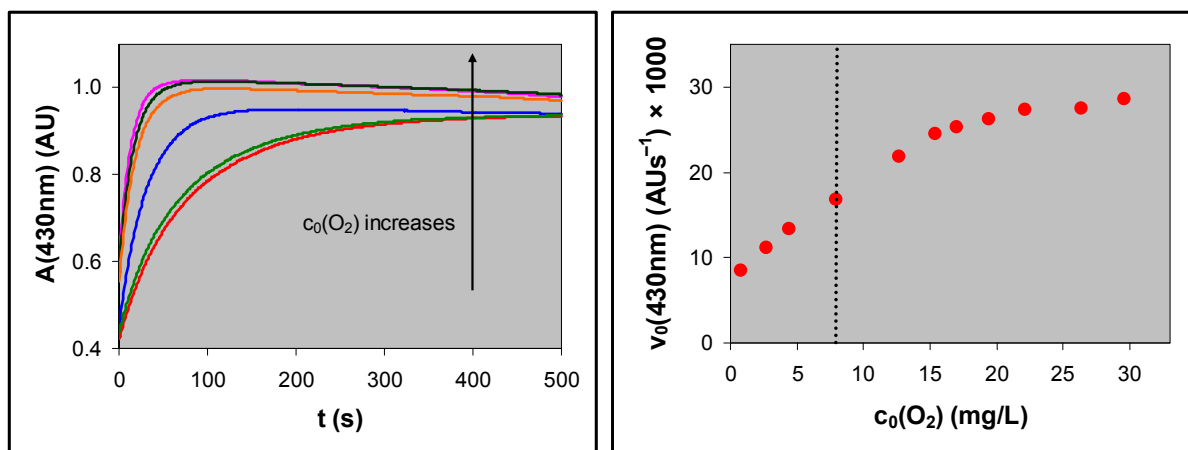

**Figure S9** Left: Kinetic curves recorded with different initial concentrations of dissolved  $\text{O}_2$ . The initial concentrations of Mn(III)TTEG and HU were constant. Right: Dependence of the initial rate of reaction on the initial concentration of  $\text{O}_2$ . The dotted line indicates the solution saturated with air at atmospheric pressure.  $c_0(\text{Mn(III)TTEG}) = 4.98 \mu\text{M}$ ,  $c_0(\text{HU}) = 101 \mu\text{M}$ ,  $c(\text{NaOH}) = 5.0 \text{ mM}$ ,  $c_0(\text{O}_2) = \text{from } 0.81 \text{ mg/L to } 7.99 \text{ mg/L}$ ,  $I = 1.0 \text{ M}$ ,  $T = 25.0 \text{ }^\circ\text{C}$ .
